# Supplementary material for: Simulation of Health and Economic Benefits of Extended Observation of Resolved Anaphylaxis
Source: PubMed Central journal article supplement (PMC6820064; doi:10.1001/jamanetworkopen.2019.13951), 2019-10-23
Supplement: jamanetwopen-2-e1913951-s001.pdf [file jamanetwopen-2-e1913951-s001.pdf]

## Supplementary Online Content

Shaker M, Wallace D, Golden DBK, Oppenheimer J, Greenhawt M. Simulation of health and economic benefits of extended observation of resolved anaphylaxis. *JAMA Netw Open*. 2019;2(10):e1913951. doi:10.1001/jamanetworkopen.2019.13951

**eFigure 1.** Decision Model

**eFigure 2.** Sensitivity Analysis (Cost per Death Prevented)

**eTable.** Time-Dependent Activity-Based Costing Estimates

This supplementary material has been provided by the authors to give readers additional information about their work.

eFigure 1. Decision Model

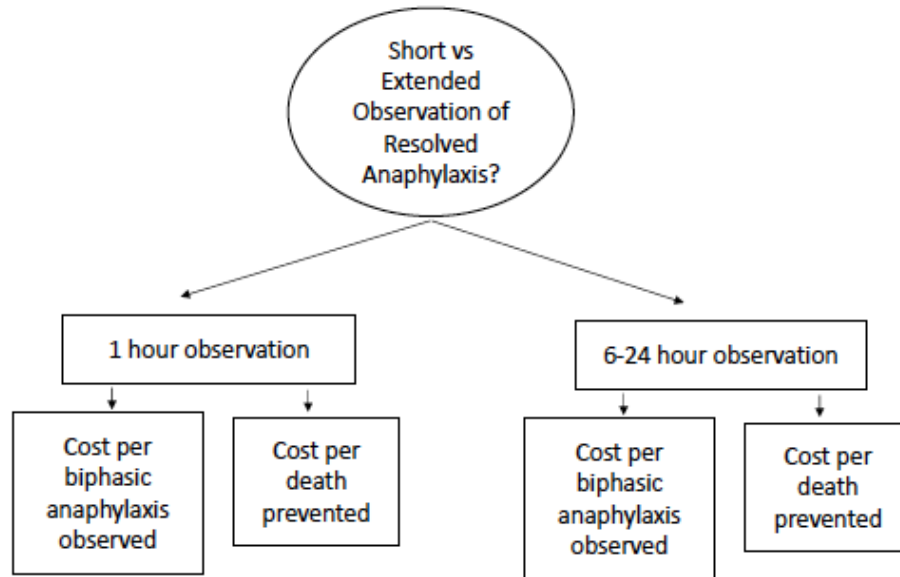

Legend: Decision Model of 1-hour vs 6 to 24-hour post-anaphylaxis resolution observation time.

eFigure 2. Sensitivity Analysis (Cost per Death Prevented)

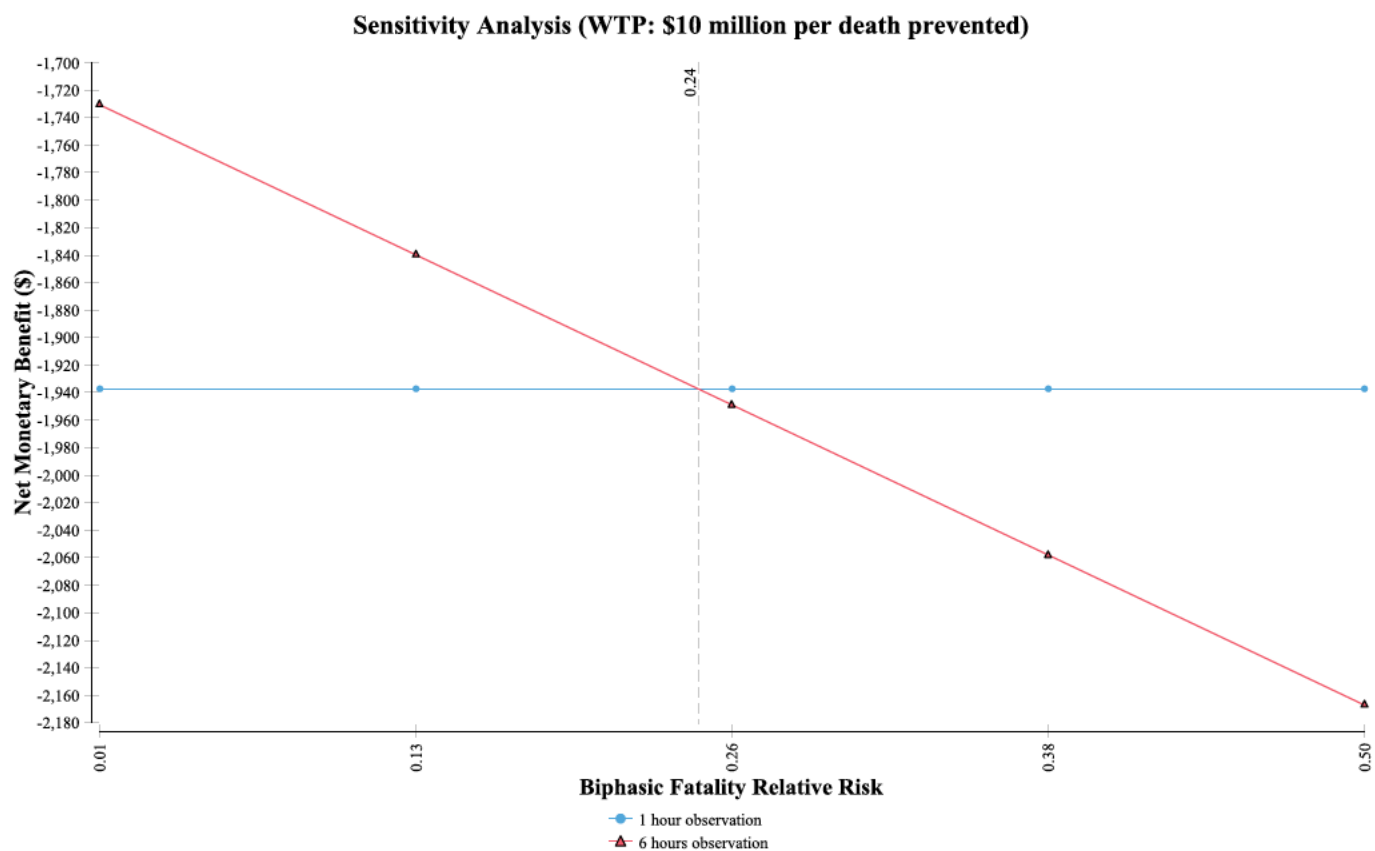

Legend: Deterministic sensitivity analysis of fatality relative risk for biphasic anaphylaxis (following complete resolution). If the relative risk for biphasic anaphylaxis is 24% or less (HCP perspective), then extended observation for 6 hours would cost less than \$10 million dollars per death prevented ( $\leq 9\%$  from the societal perspective)

eTable. Time-Dependent Activity-Based Costing Estimates

| Resource               | Cost per minute<br>(2019 dollars) | Cost per hour<br>(2019 dollars) |
|------------------------|-----------------------------------|---------------------------------|
| Exam Room              | \$0.03                            | \$1.92                          |
| Allergist/Immunologist | \$3.62                            | \$217.20                        |
| Registered Nurse       | \$0.78                            | \$46.80                         |
| Medical assistant      | \$0.35                            | \$21.00                         |
| Total                  |                                   | \$286.92                        |
